# Supplementary material for: Increased Proinflammatory Cytokine Production and Decreased Cholesterol Efflux Due to Downregulation of ABCG1 in Macrophages Exposed to Indoxyl Sulfate
Source: MDPI journal article supplement (doi:10.3390/toxins7083155), 2015-08-14
Supplement: s1 [file s1]

# Supplementary Materials

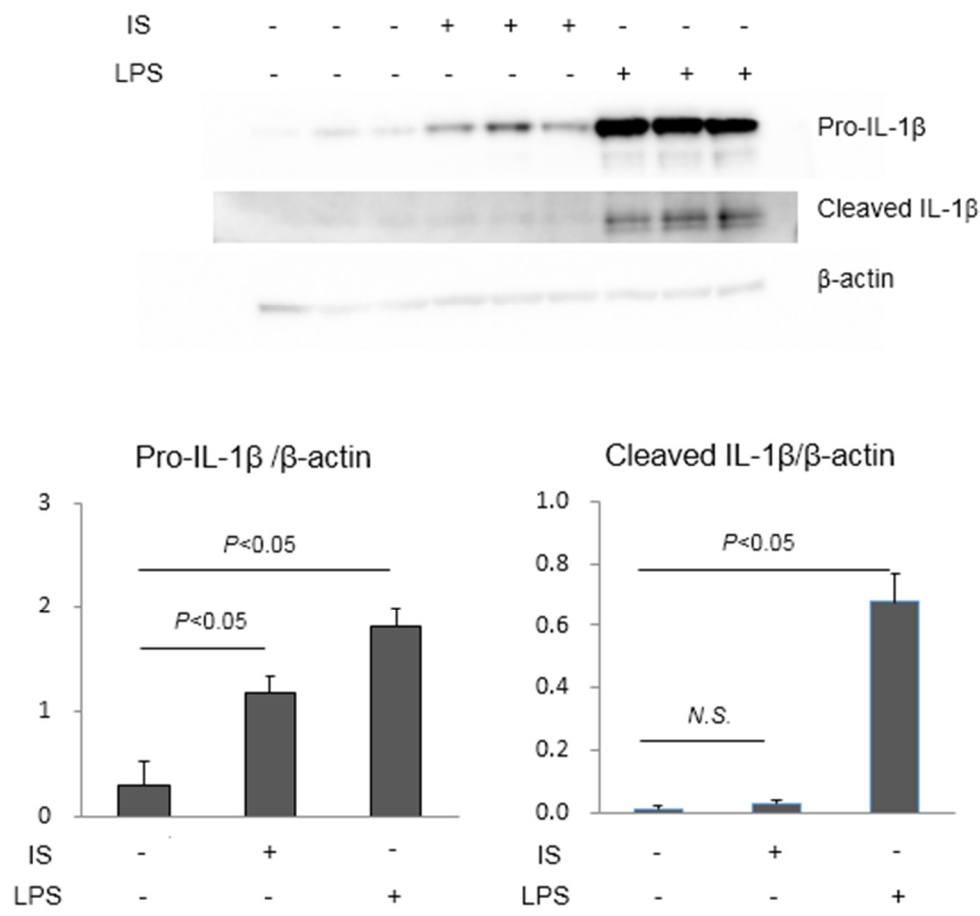

**Figure S1.** Western blot analysis evaluating IL-1b expression in THP-1 macrophages exposed to IS. Data represent the mean  $\pm$  SD of three experiments.

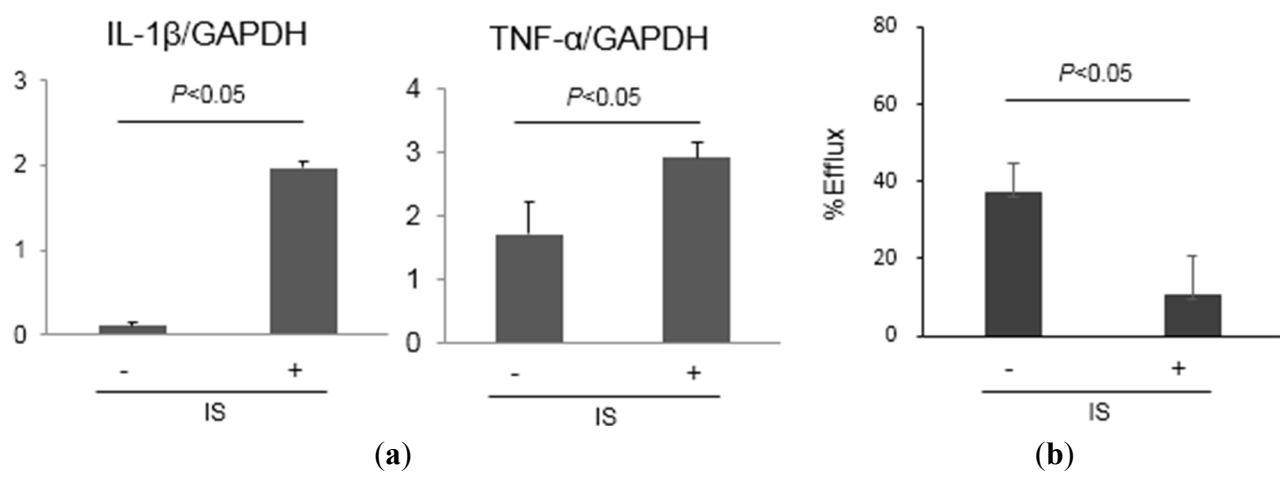

**Figure S2.** (a) Effect of IS (1 mM) on pro-IL-1 $\beta$  and TNF- $\alpha$  mRNA expression in human peripheral monocyte-derived macrophages. Data represent the mean  $\pm$  SD of three experiments; (b) Cholesterol efflux of macrophages. Lipid-enriched human peripheral monocyte-derived macrophages were exposed to IS (1 mM) and high-density lipoprotein (50  $\mu$ g/mL) from healthy subjects for 24 h, and the cellular lipid contents adjusted for protein concentration were measured. Data represent the mean  $\pm$  SD of three experiments.

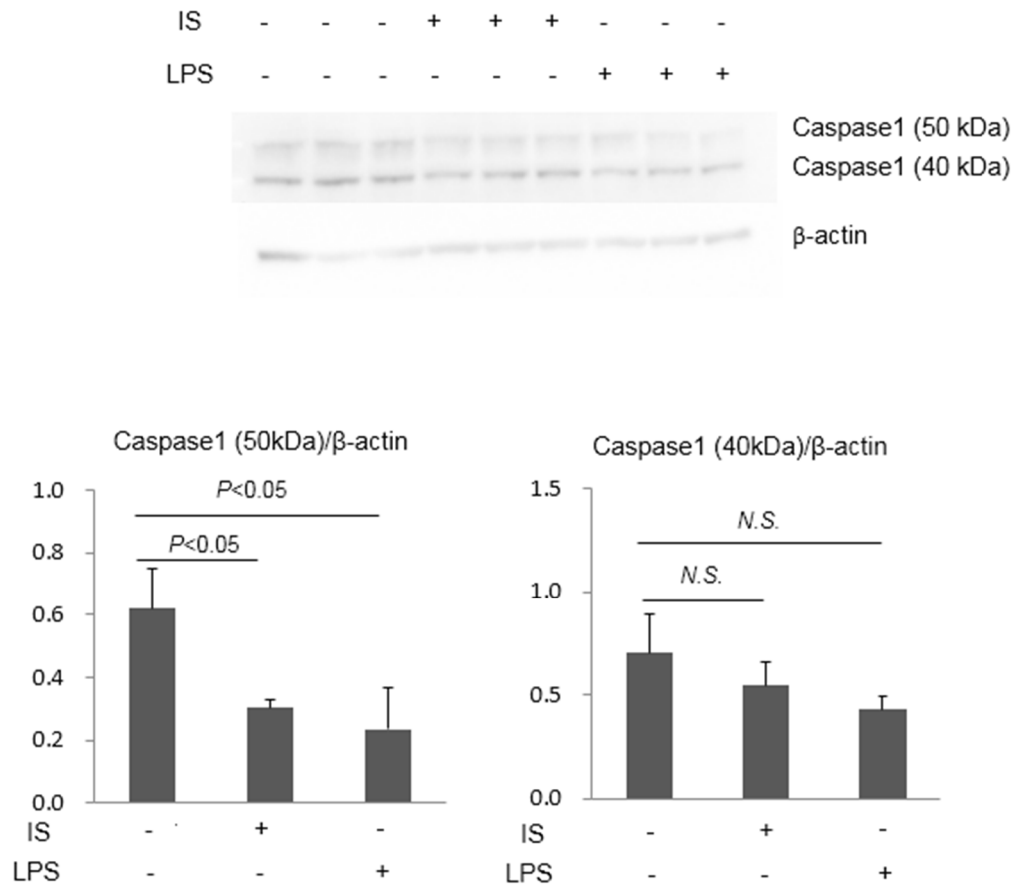

**Figure S3.** Western blot analysis of caspase-1 protein in THP-1 macrophages exposed to IS. Data represent the mean  $\pm$  SD of three experiments.
